# Supplementary material for: Cu–Pd bimetal-decorated siloxene nanosheets for semi-hydrogenation of acetylene
Source: Royal Society of Chemistry journal article supplement (doi:10.1039/d4nr01911c), 2024-01-01
Supplement: d4nr01911c1.pdf [file d4nr01911c1.pdf]

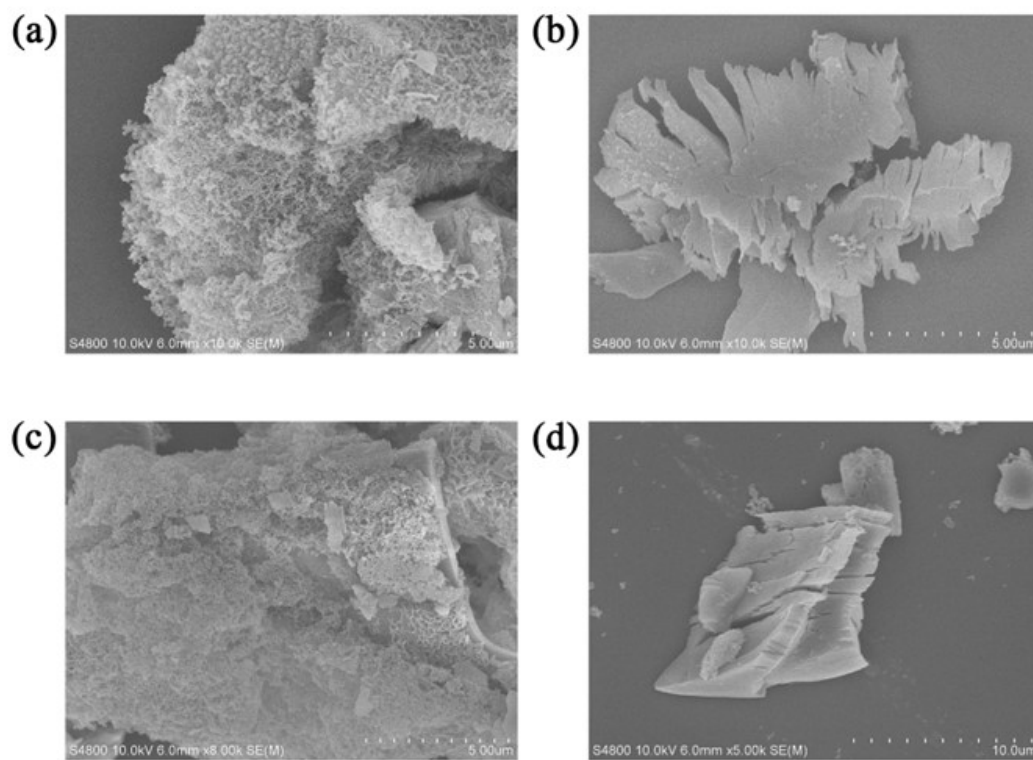

**Fig. S1** SEM images of (a-b) siloxene, (c-d) PdCu/Siloxene.

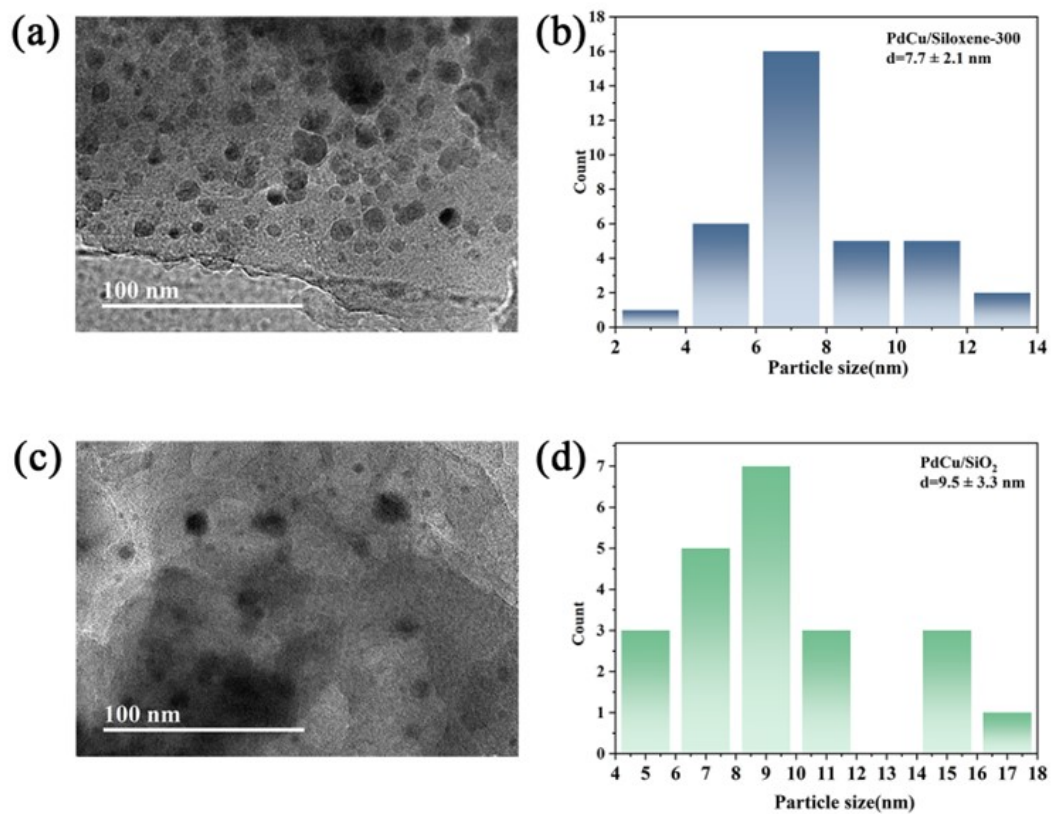

**Fig. S2** (a) TEM image, (b) the diameter distribution of PdCu/Siloxene-300. (c) TEM image, (d) the diameter distribution of PdCu/SiO<sub>2</sub>.

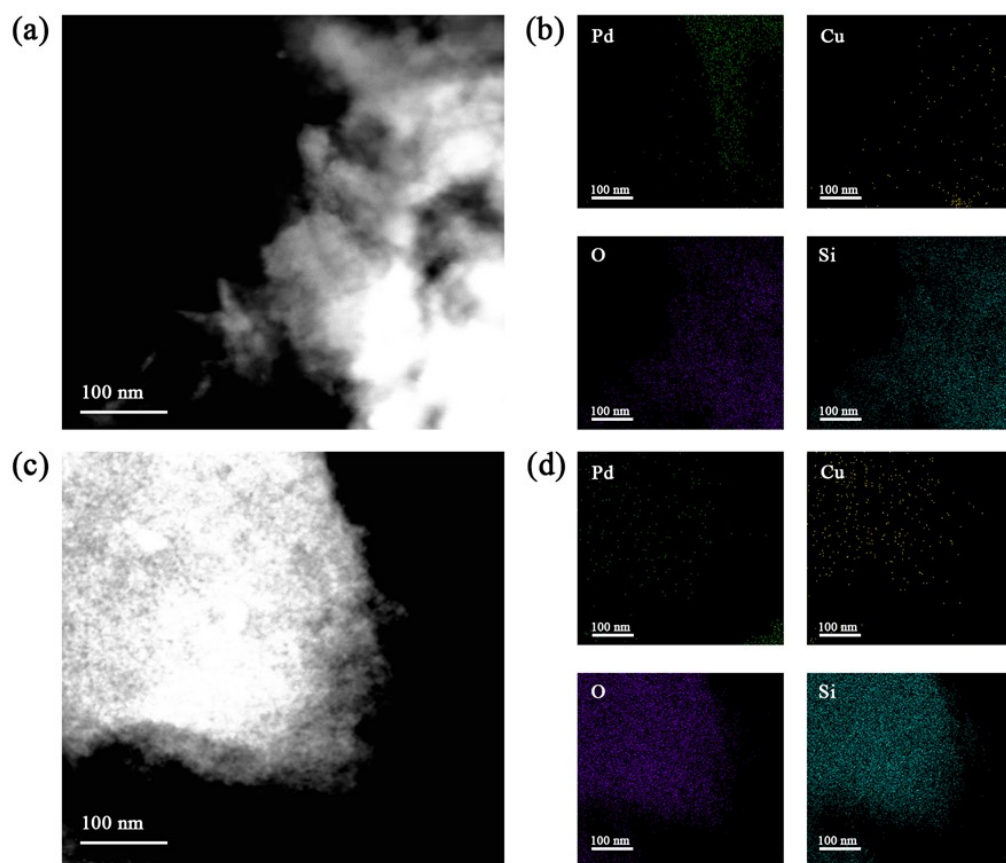

**Fig. S3** (a) HAADF-STEM, (b) EDS mapping of PdCu/Siloxene-300. (c) HAADF-STEM, (d) EDS mapping of PdCu/SiO<sub>2</sub>.

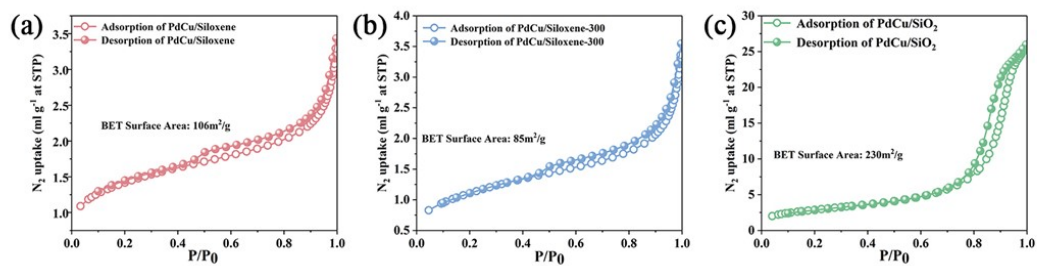

**Fig. S4** BET surface area of (a) PdCu/Siloxene, (b) PdCu/Siloxene-300, and (c) PdCu/SiO<sub>2</sub>.

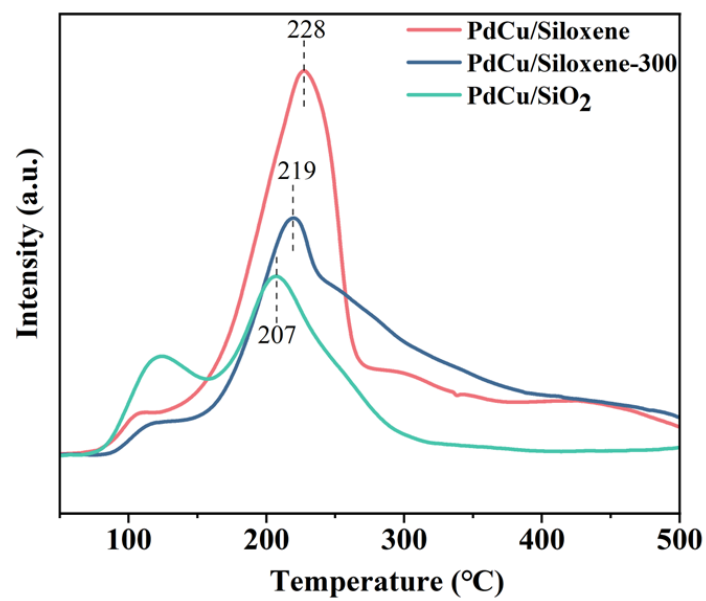

Fig. S5 H<sub>2</sub>-TPR profiles of three catalysts.

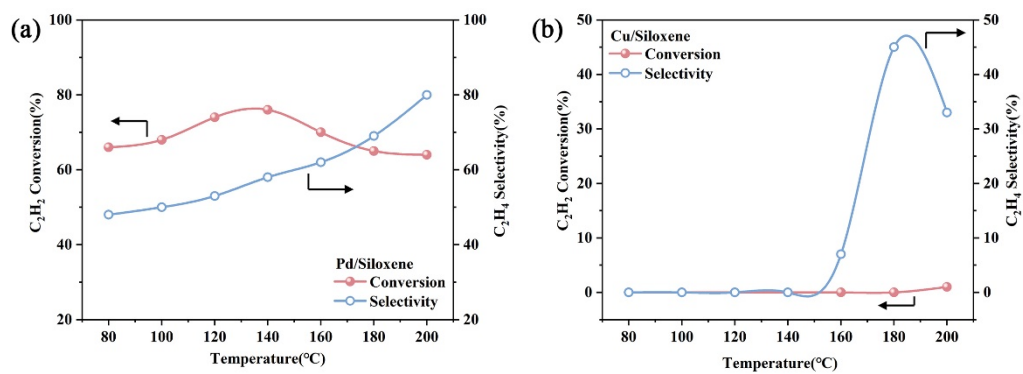

**Fig. S6** Acetylene conversion and ethylene selectivity over (a) Pd/Siloxene and (b) Cu/Siloxene.

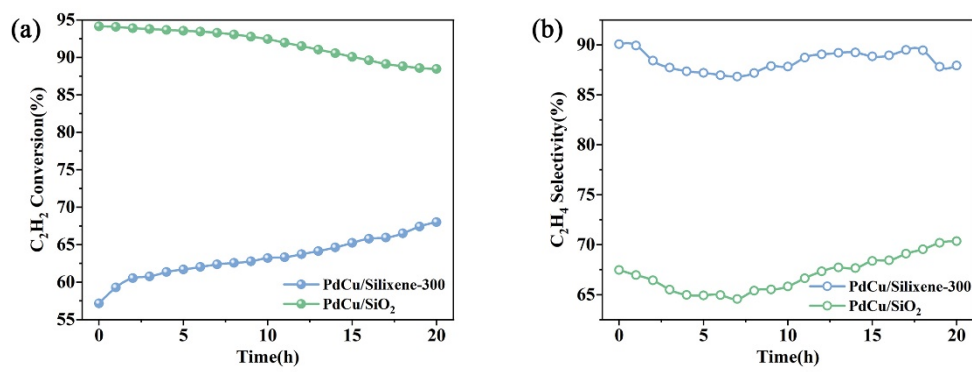

**Fig. S7** Stability evaluation during a 20 hours test at 200 °C over PdCu/Siloxene-300 and PdCu/SiO<sub>2</sub>: (a) acetylene conversion, (b) ethylene selectivity.

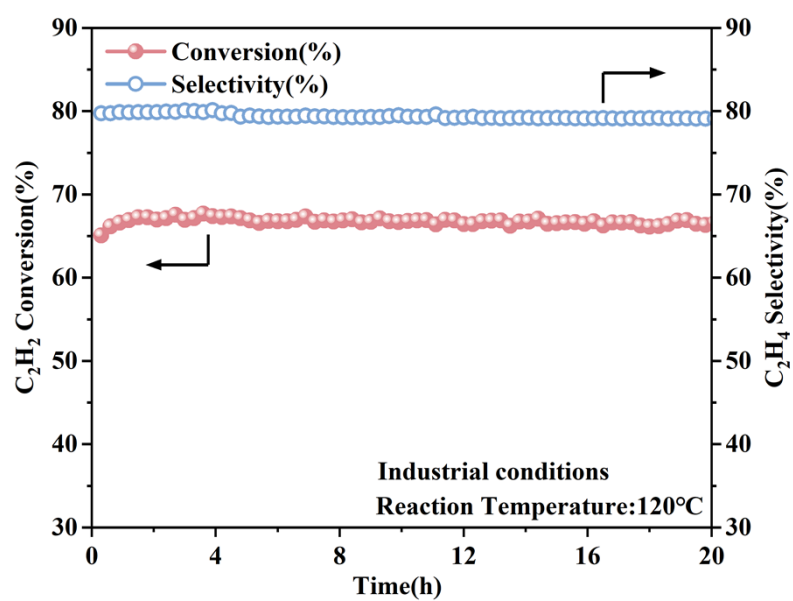

**Fig. S8** Stability evaluation over PdCu/Siloxene under industrial conditions. (Reaction conditions: 1.0 % C<sub>2</sub>H<sub>2</sub>, 10.0 % H<sub>2</sub> and 20 % C<sub>2</sub>H<sub>4</sub>, with N<sub>2</sub> balance, total stream flow of 50 mL·min<sup>-1</sup>; Reaction temperature=120 °C.)



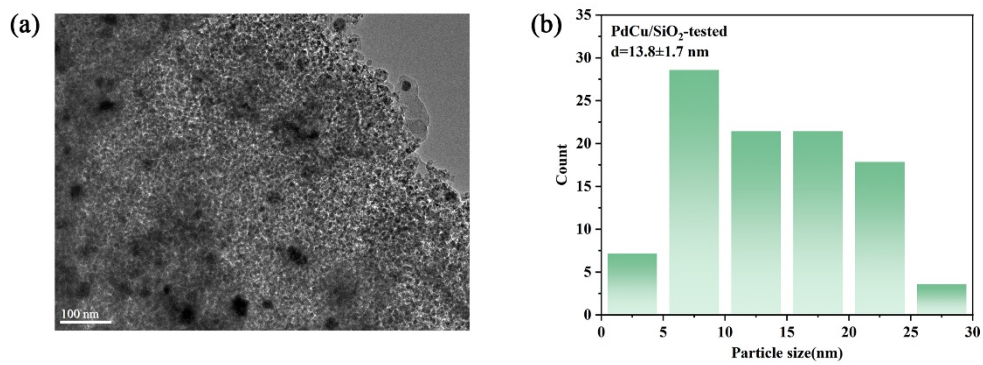

**Fig. S9** (a) TEM image, (b) the diameter distributions of PdCu/SiO<sub>2</sub>-tested.

**Table S1.** Metal loadings of the three different catalysts.

| <b>Sample</b>               | <b>Metal loading</b> |                 |
|-----------------------------|----------------------|-----------------|
|                             | <b>Cu (wt%)</b>      | <b>Pd (wt%)</b> |
| <b>PdCu/Siloxene</b>        | 3.2                  | 0.1             |
| <b>PdCu/Siloxene-300</b>    | 2.6                  | 0.1             |
| <b>PdCu/SiO<sub>2</sub></b> | 2.5                  | 0.1             |

**Table S2.** Long-term catalytic performance of different catalysts based semi-hydrogenation of acetylene.

| Catalysts                                           | Gas composition (vol. %)                                                                                                                         | Metal loading (wt. %) | Stability      |                 |                  | Reaction time (h) | Ref.      |
|-----------------------------------------------------|--------------------------------------------------------------------------------------------------------------------------------------------------|-----------------------|----------------|-----------------|------------------|-------------------|-----------|
|                                                     |                                                                                                                                                  |                       | Conversion (%) | Selectivity (%) | Temperature (°C) |                   |           |
| PdCu/Siloxene                                       | C <sub>2</sub> H <sub>2</sub> 1.0 % / H <sub>2</sub> 10 % / N <sub>2</sub> balance<br>50mL·min <sup>-1</sup>                                     | Pd 0.1<br>Cu 3.2      | ~ 93           | ~ 91            | 200              | 39                | This work |
| Pd/Bi <sub>2</sub> O <sub>3</sub> /TiO <sub>2</sub> | C <sub>2</sub> H <sub>2</sub> 1 % / H <sub>2</sub> 20 %<br>/C <sub>2</sub> H <sub>4</sub> 20 % /N <sub>2</sub> balance<br>60mL·min <sup>-1</sup> | Pd 2.3<br>Bi 4.9      | ~ 64           | ~ 93            | 40               | 24                | [1]       |
| CuB2 CuPd-2                                         | C <sub>2</sub> H <sub>2</sub> 0.5 % / H <sub>2</sub> 5%<br>/C <sub>2</sub> H <sub>4</sub> 10 % /Ar balance<br>50mL·min <sup>-1</sup>             | N.A.                  | ~ 92.5         | ~ 87.7          | 80               | 24                | [2]       |
| Pd <sub>1</sub> Cu <sub>1</sub> /ND@G               | C <sub>2</sub> H <sub>2</sub> 1 % / H <sub>2</sub> 10 %<br>/C <sub>2</sub> H <sub>4</sub> 20 % /He balance<br>30mL·min <sup>-1</sup>             | Pd 0.09<br>Cu 0.49    | ~ 68           | ~ 92            | 90               | 100               | [3]       |
| Pd/MgAl <sub>2</sub> O <sub>4</sub>                 | C <sub>2</sub> H <sub>2</sub> 1 % / H <sub>2</sub> 5 %<br>/C <sub>2</sub> H <sub>4</sub> 20 % /Ar balance<br>40 mL·min <sup>-1</sup>             | Pd 0.1                | ~ 90           | ~ 83            | 120              | 50                | [4]       |
| Ni <sub>3</sub> ZnC <sub>0.7</sub> /C               | C <sub>2</sub> H <sub>2</sub> 1 % / H <sub>2</sub> 15 % /N <sub>2</sub><br>balance<br>100mL·min <sup>-1</sup>                                    | Ni <sub>3</sub> Zn 2  | ~ 95           | ~ 85            | 160              | 10                | [5]       |
| CuPd <sub>0.006</sub> /SiO <sub>2</sub>             | C <sub>2</sub> H <sub>2</sub> 1.0 % / H <sub>2</sub> 20.0 %<br>/C <sub>2</sub> H <sub>4</sub> 20.0 % /He<br>balance<br>30mL·min <sup>-1</sup>    | Cu 4.96<br>Pd 0.0494  | ~ 99           | ~ 45            | 160              | 24                | [6]       |
| Pd-His/SiO <sub>2</sub>                             | C <sub>2</sub> H <sub>2</sub> 1 % / H <sub>2</sub> 10 %<br>/Ar balance<br>30mL·min <sup>-1</sup>                                                 | Pd 0.48               | ~ 100          | ~ 76 to ~ 81    | 160              | 50                | [7]       |
| Pt <sub>3</sub> Fe/SiO <sub>2</sub>                 | C <sub>2</sub> H <sub>2</sub> 1 % / H <sub>2</sub> 2 % /<br>He balance<br>50mL·min <sup>-1</sup>                                                 | Pt 18.9<br>Fe 1.7     | ~ 99           | ~ 83            | 180              | 40                | [8]       |
| NiCu/ZrO <sub>2</sub>                               | C <sub>2</sub> H <sub>2</sub> 1 % / H <sub>2</sub> 10 %<br>/C <sub>2</sub> H <sub>4</sub> 20 % /Ar balance<br>40mL·min <sup>-1</sup>             | Ni 4.6<br>Cu 4.8      | ~ 100          | ~ 94 to ~ 91    | 220              | 15                | [9]       |

## References:

1. S. Zou, B. Lou, K. Yang, W. Yuan, C. Zhu, Y. Zhu, Y. Du, L. Lu, J. Liu, W. Huang, B. Yang, Z. Gong, Y. Cui, Y. Wang, L. Ma, J. Ma, Z. Jiang, L. Xiao and J. Fan, *Nat. Commun.*, 2021, **12**, 5770.
2. Q. Gao, Z. Yan, W. Zhang, H. S. Pillai, B. Yao, W. Zang, Y. Liu, X. Han, B. Min, H. Zhou, L. Ma, B. Anaclet, S. Zhang, H. Xin, Q. He and H. Zhu, *J. Am. Chem. Soc.*, 2023, **145**, 19961-19968.
3. F. Huang, M. Peng, Y. Chen, X. Cai, X. Qin, N. Wang, D. Xiao, L. Jin, G. Wang, X.-D. Wen, H. Liu and D. Ma, *J. Am. Chem. Soc.*, 2022, **144**, 18485-18493.
4. Z. Li, G. Lin, Y. Chen, Q. Xue, K. Feng and B. Yan, *Catal. Today*, 2023, **423**, 114253.
5. Y. Wang, B. Liu, X. Lan and T. Wang, *ACS Catal.*, 2021, **11**, 10257-10266.
6. G. X. Pei, X. Y. Liu, X. Yang, L. Zhang, A. Wang, L. Li, H. Wang, X. Wang and T. Zhang, *ACS Catal.*, 2017, **7**, 1491-1500.
7. Q. Wu, C. Shen and C.-j. Liu, *Appl. Surf. Sci.*, 2023, **607**, 154976.
8. D. Zhou, G. Zhang, Y. Li, S. Liu, S. Han, Y. Zhou and W. Shen, *Chem. Eng. J.*, 2023, **472**, 144875.
9. J. Gu, M. Jian, L. Huang, Z. Sun, A. Li, Y. Pan, J. Yang, W. Wen, W. Zhou, Y. Lin, H.-J. Wang, X. Liu, L. Wang, X. Shi, X. Huang, L. Cao, S. Chen, X. Zheng, H. Pan, J. Zhu, S. Wei, W.-X. Li and J. Lu, *Nat. Nanotechnol.*, 2021, **16**, 1141-1149.
